# Supplementary material for: An isoform of AIF1 involved in breast cancer
Source: PubMed Central journal article supplement (PMC6198497; doi:10.1186/s12935-018-0663-3), 2018-10-22

Figure S3

A)

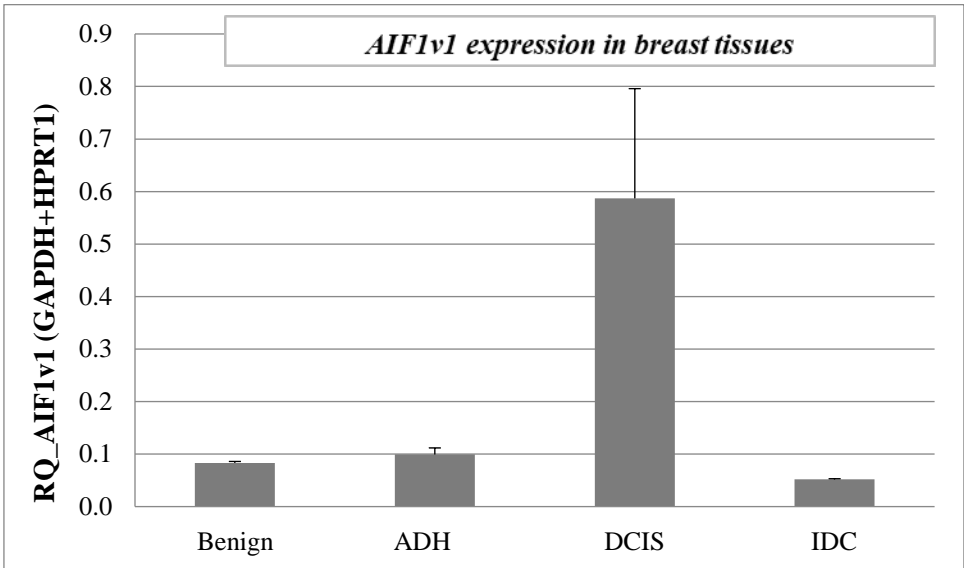

B)

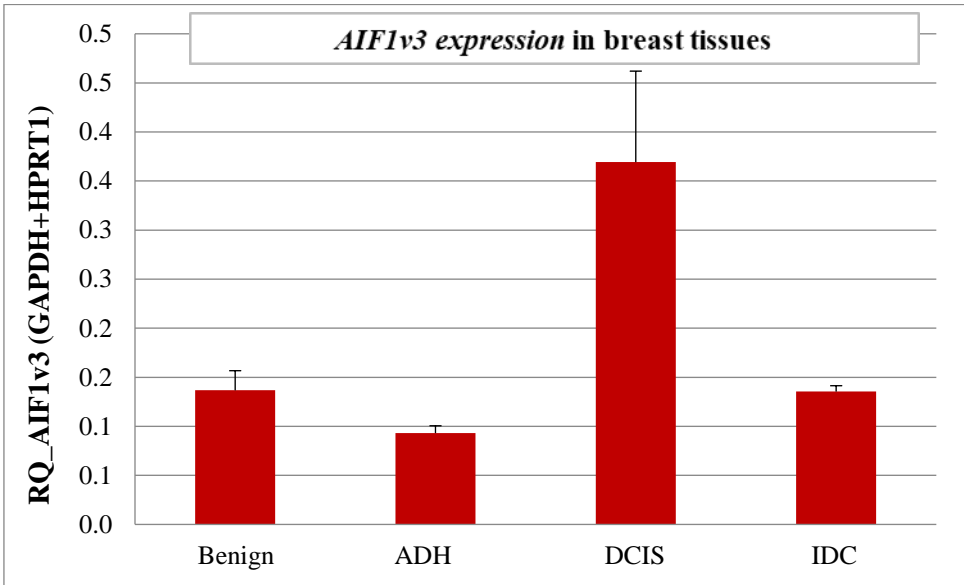

Supplement: 12935_2018_663_MOESM5_ESM.pdf [file 12935_2018_663_MOESM5_ESM.pdf]
